# Supplementary material for: Factor XI in Carriers of Antiphospholipid Antibodies: Elevated Levels Associated with Symptomatic Thrombotic Cases, While Low Levels Linked to Asymptomatic Cases
Source: MDPI journal article supplement (doi:10.3390/ijms242216270), 2023-11-13
Supplement: s1 [file s1]

**Supplementary table 1.** Antiphospholipid antibodies of aPL patients according to the FXI:C levels.

|                               | <b>FXI:C &lt;70% (N= 13)</b> | <b>FXI:C &gt;150% (N= 18)</b> | <b>p</b> |
|-------------------------------|------------------------------|-------------------------------|----------|
| <b>LA N (%)</b>               | 10 (76.9)                    | 13 (72.2)                     | 1.00     |
| <b>LA only N(%)</b>           | 6 (46.2)                     | 6 (33.3)                      | 0.470    |
| <b>aCL</b>                    |                              |                               |          |
| IgM N (%)                     | 2 (15.4)                     | 3 (16.7)                      | 0.924    |
| IgG N (%)                     | 3 (23.1)                     | 3 (16.7)                      | 0.656    |
| IgM and/or IgG N(%)           | 4 (30.8)                     | 7 (38.9)                      | 0.641    |
| IgM and IgG N(%)              | 1 (7.7)                      | 0 (0)                         | 0.232    |
| <b>aCL only N(%)</b>          | 0 (0)                        | 1 (5.6)                       | 0.388    |
| <b>aβ2GP1</b>                 |                              |                               |          |
| IgM N(%)                      | 3 (25)                       | 1 (5.6)                       | 0.32     |
| IgG N(%)                      | 4 (30.8)                     | 6 (33.3)                      | 1.00     |
| IgM and/or IgG N (%)          | 4 (30.8)                     | 6 (33.3)                      | 1.00     |
| IgM and IgG N(%)              | 2 (16.7)                     | 1 (5.6)                       | 1.00     |
| <b>aβ2GP1 only N(%)</b>       | 0 (0)                        | 2 (11.1)                      | 0.214    |
| <b>N° aPL</b>                 |                              |                               |          |
| <b>1 N (%)</b>                | 6 (46.2)                     | 8 (44.4)                      | 1.00     |
| <b>2 N (%)</b>                | 0 (0)                        | 3 (16.7)                      | 0.35     |
| <b>3 N (%)</b>                | 4 (30.8)                     | 4 (22.2)                      | 0.90     |
| <b>Thrombotic aPL profile</b> |                              |                               |          |
| <b>Low N (%)</b>              | 3 (23.1)                     | 5 (27.8)                      | 1.00     |
| <b>High N (%)</b>             | 10 (76.9)                    | 13 (72.2)                     | 1.00     |

Abbreviations: antiphospholipid autoantibodies (aPL); anti β2 glycoprotein B1 (aβ2GP1); anti cardiolipin (aCL); Lupus anticoagulant (LA).

**Supplementary table 2.** Correlation analysis between coagulant activity of FXI and anticardiolipin and anti $\beta$ 2GP1 antibody titre.

|                    | FXI:C (SS)              |              | FXI:C (SFX)             |              |
|--------------------|-------------------------|--------------|-------------------------|--------------|
|                    | Correlation coefficient | p            | Correlation coefficient | p            |
| a $\beta$ 2GP1 IgM | -0.23                   | <b>0.002</b> | -0.21                   | <b>0.005</b> |
| a $\beta$ 2GP1 IgG | -0.22                   | <b>0.002</b> | -0.16                   | <b>0.031</b> |
| aCL IgM            | -0.15                   | <b>0.034</b> | -0.14                   | 0.057        |
| aCL IgG            | -0.197                  | <b>0.006</b> | -0.13                   | 0.081        |

Abbreviations: anti  $\beta$ 2 glycoprotein B1 (a $\beta$ 2GP1); anti cardiolipin (aCL).

**Supplementary table 3.** Genetic defects, FXI:C and type of FXI deficiency detected in 4 cases with congenital FXI deficiency identified in this study.

| Patient | Group | cDNA variant | Protein variant | FXI:C | Type of deficiency | Reference HGMD |
|---------|-------|--------------|-----------------|-------|--------------------|----------------|
| P1      | APS   | c.403G>T     | p.Glu135Ter     | 50%   | CRM-               | CM890042       |
| P2      | AaPL  | c.403G>T     | p.Glu135Ter     | 49%   | CRM-               | CM890042       |
| P3      | AaPL  | c.802C>T     | p.Arg268Cys     | 44%   | CRM-               | CM035499       |
| P4      | HC    | c.1327C>T    | p.Arg443Cys     | 23%   | CRM-               | CM062624       |

Abbreviations: Asymptomatic carriers of antiphospholipid antibodies (AaPL); Healthy controls (HC); Primary antiphospholipid syndrome (APS).
